# Supplementary material for: An electrochemical glucose biosensor based on graphene composites: use of dopamine as reducing monomer and as site for covalent immobilization of enzyme
Source: Royal Society of Chemistry journal article supplement (doi:10.1039/c4ra04975f), 2014-09-08
Supplement: c4ra04975f1.pdf [file c4ra04975f1.pdf]

## Supporting Information

### **Electrochemical glucose biosensor based on graphene composites: Use of dopamine as reducing monomer and as site for covalent immobilization of enzyme<sup>†</sup>**

**Huiping Liu,<sup>a,b</sup> Cheng-an Tao,<sup>a</sup> Zhihong Hu,<sup>a</sup> Sida Zhang,<sup>a</sup> Jianfang Wang<sup>\*a</sup> and Yonggong Zhan<sup>\*b</sup>**

*<sup>a</sup> College of Science, National University of Defense Technology, Changsha 410073, P. R. China Fax: +86 731 8457 4250;*

*Tel: +86 731 8457 4241; E-mail: wangjianfang@nudt.edu.cn*

*<sup>b</sup> College of Chemistry and Chemical Engineering, Hunan University, Changsha, 410081, P. R. China. Tel: +86 731 88821449;*

*E-mail: ygzhan2006@hnu.edu.cn*

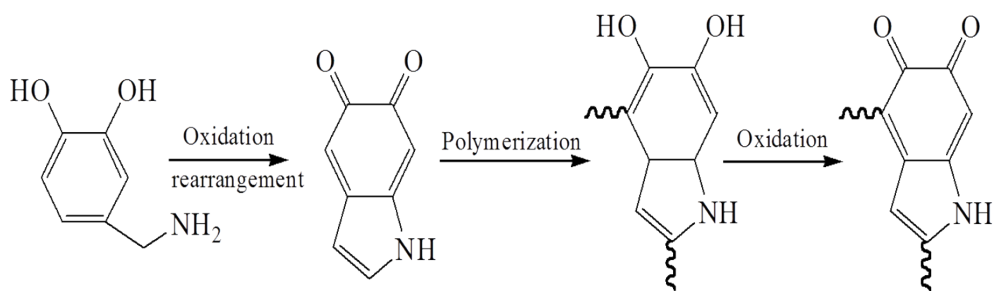

**Fig.S1** Scheme of Self-Polymerization of Dopamine [1-4]

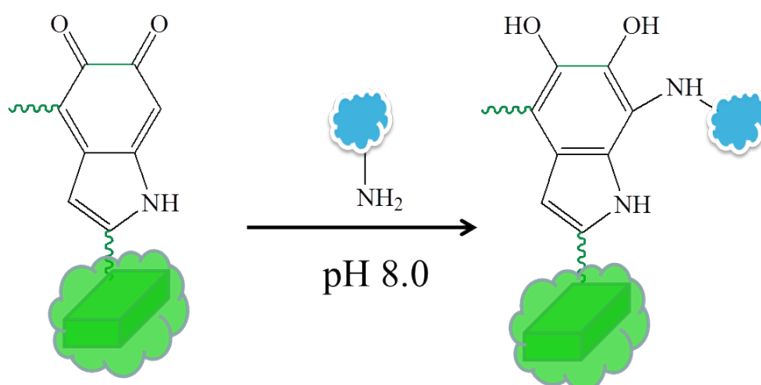

**Fig.S2** The Michal addition reaction between PDA and GOD [2, 5-6]

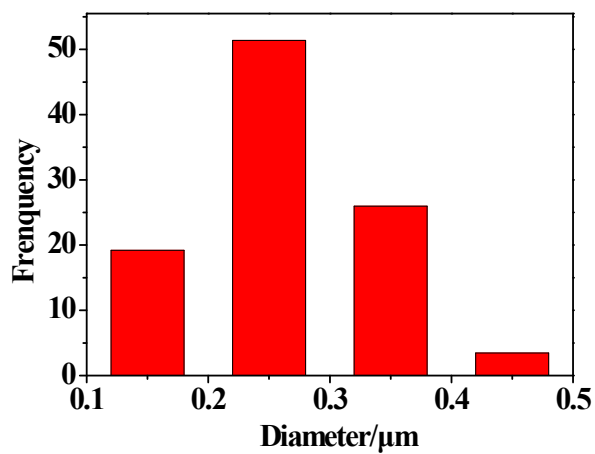

**Fig. S3** The distribution of the particle number on the surface of GCE/PDA-RGO/GOD/Pt NPs

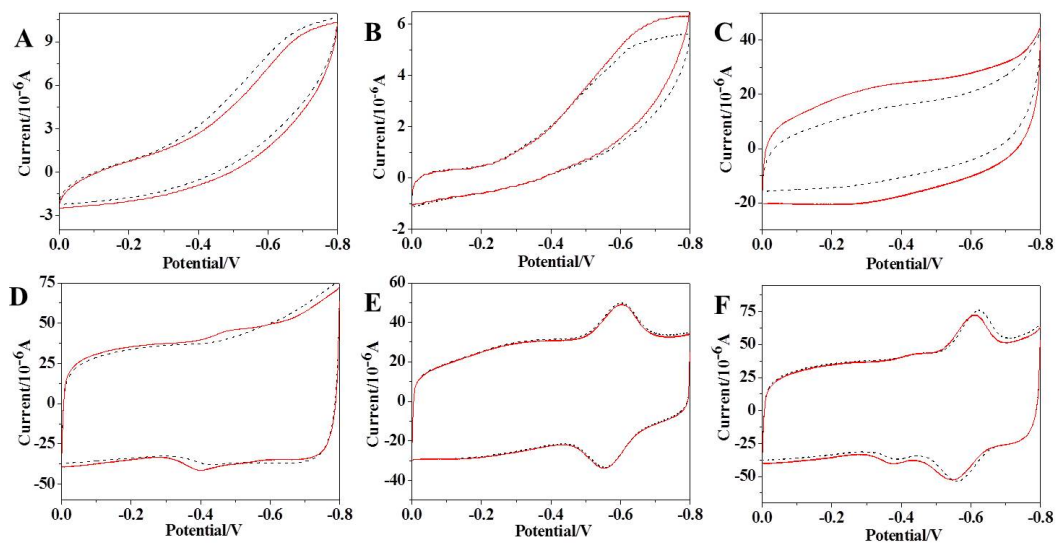

**Fig. S4** Cyclic voltammograms at different modified electrodes in PBS solution in the absence and in the presence of 0.2mM glucose in pH 7.4 PBS at the rate of 0.1V/s. (A)GOD, (B)PDA, (C)RGO-PDA, (D)RGO-PDA/PtNPs, (E)RGO-PDA/GOD, (F)RGO-PDA/GOD/PtNPs.

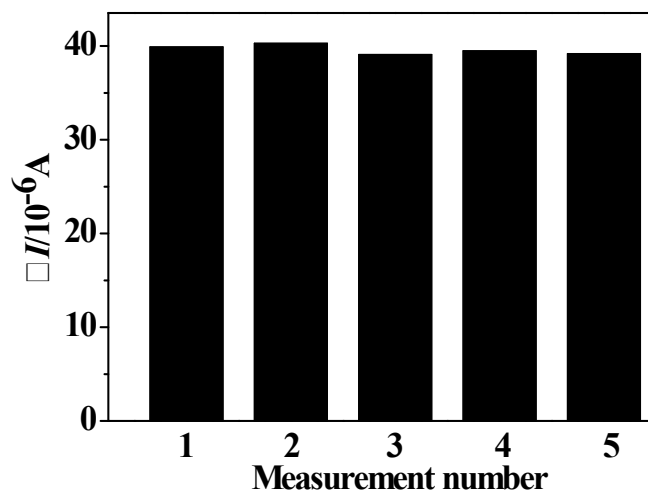

**Fig.S5** The current responses of GCE/PDA-RGO/GOD/PtNPs to 0.2 mM glucose in five measurements.

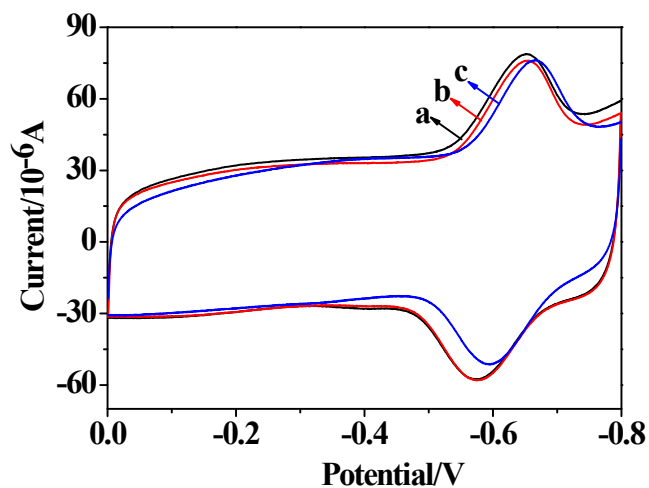

**Fig.S6** Cyclic voltammograms of GCE/PDA-RGO/GOD/PtNPs in pH 7.4 PBS at the rate of 0.1V/s recorded at the 1<sup>st</sup> (a), and the 50th cycle (b). Curve c is CV of the modified electrode after has been stored in PBS at 4°C for a week.

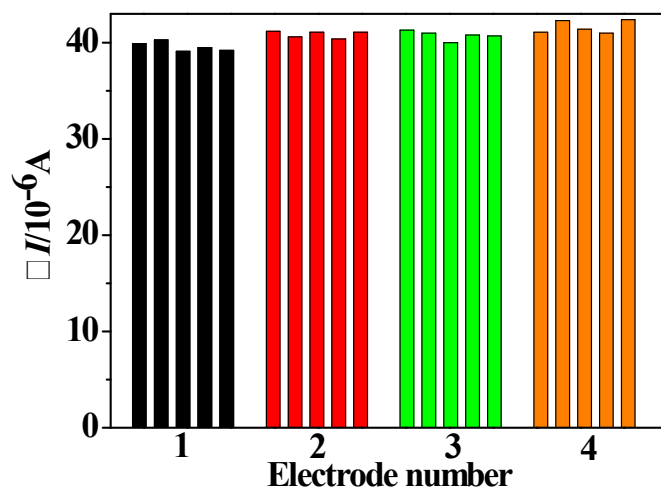

**Fig.S7** Cyclic voltammograms of GCE/PDA-RGO/GOD/PtNPs in pH 7.4 PBS at the rate of 0.1V/s in the presence of 0.2mM glucose.

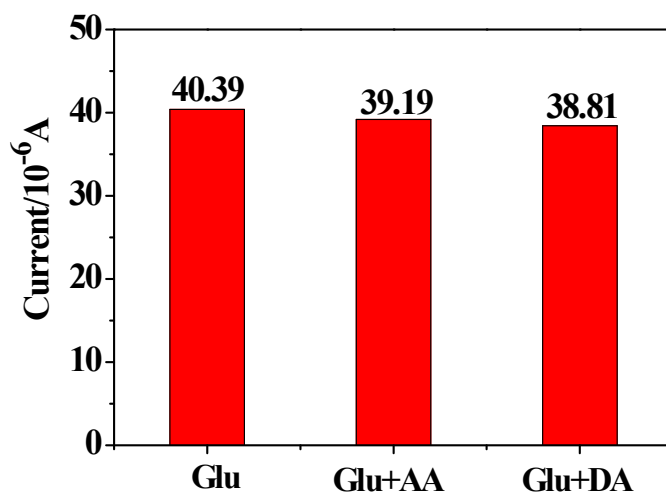

Fig.S8 The current response on the GCE/PDA-RGO/GOD/PtNPs with different substance, respectively

### Sensing mechanism of GCE/PDA-RGO/GOD/PtNPs in different conditions [7-9]

*In the pH 7.4 PBS (N<sub>2</sub>-saturated) solution*

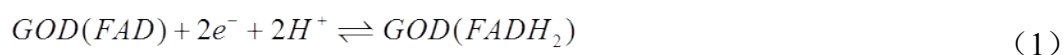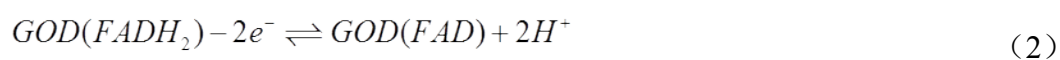

*In the pH 7.4 PBS (air-saturated) solution*

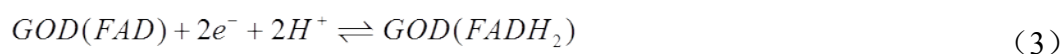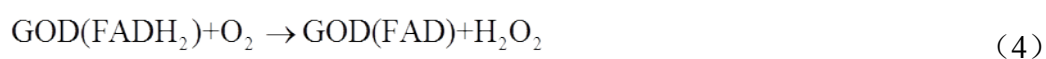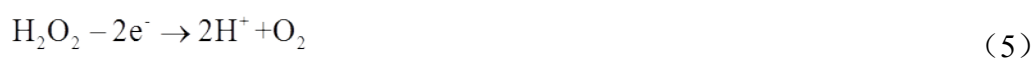

*In pH 7.4 PBS(Air-saturated) solution with the adding of glucose*

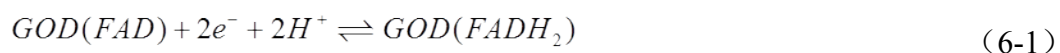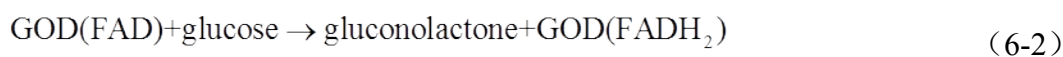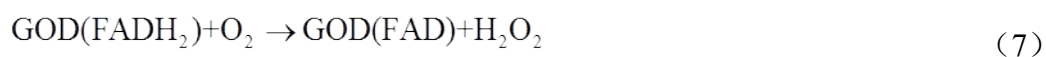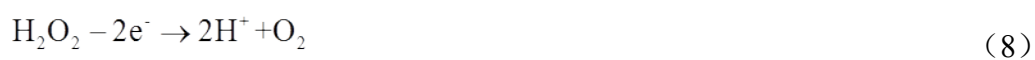

## References

- [1] T. Luczak, *Electrochimica Acta*, 2008, 53, 5725-5731.
- [2] F. Yu, S. G. Chen, Y. Chen, H. M. Li, L. J. Yang, Y. Y. Chen, Y. S. Yin, *Journal of Molecular Structure*, 2010, 982, 152-161.
- [3] E. Faure, C. F. Daudré, C. Jérôme, J. Lyskawa, D. Fournier, P. Woisel, C. Detrembleur, *Progress in Polymer Science*, 2013, 38, 236-270.
- [4] S. Chumillas, M. C. Figueiredo, V. Climent, J. M. Feliu, *Electrochimica Acta*, 2013, 109, 577-586.
- [5] L. A. Burzio, J. H. Waite, *Biochemistry*, 2000, 39, 11147.
- [6] L. Q. Xu, W. J. Yang, K. G. Neoh, E. T. Kang, G. D. Fu, *Macromolecules*, 2010, 43, 8336-8339.
- [7] H. Lee, S. M. Dellatore, W. M. Miller, P. B. Messersmith, *Science*, 2007, 318, 426-430.
- [7] B. Liang, L. Fang, G. Yang, Y. C. Hu, X. S. Guo, X. S. Ye, *Biosensors and Bioelectronics*, 2013, 43, 131-136.
- [8] C. S. Shan, H. F. Yang, J. F. Song, D. X. Han, A. Ivaska, L. Niu, *Anal. Chem.* 2009, 81, 2378-2382.
- [9] P. Wu, Q. Shao, Y. J. Hu, J. Jin, Y. J. Yin, H. Zhang, C. X. Cai, *Electrochimica Acta*. 2010, 55, 8606-8614.
